# Supplementary material for: Thorough utilization of rice husk: metabolite extracts for silver nanocomposite biosynthesis and residues for silica nanomaterials fabrication
Source: Royal Society of Chemistry journal article supplement (doi:10.1039/c9nj01926j), 2019-01-01
Supplement: c9nj01926j1.pdf [file c9nj01926j1.pdf]

*Supporting Information for*

# **Thorough Utilization of Rice Husk: Metabolite Extracts for Silver Nanocomposite Biosynthesis and Residues for Silica nanomaterials Fabrication**

Chun Song,<sup>\*a1</sup> Fang Ye,<sup>a1</sup> Sijie Liu,<sup>\*b</sup> Fangfang Li,<sup>b</sup> Yuxiong Huang,<sup>c</sup> Rong Ji,<sup>d</sup> Lijuan  
Zhao<sup>\*d</sup>

<sup>a</sup>Institute of Ecological and Environmental Sciences, College of Environmental Sciences,  
Sichuan Agricultural University, Chengdu, 611130, China

<sup>b</sup>School of Materials Science and Engineering, Huazhong University of Science and  
Technology, 1037 Luoyu Road, Wuhan 430074, China

<sup>c</sup>Shenzhen Environmental Science and New Energy Technology Engineering Laboratory,  
Tsinghua-Berkeley Shenzhen Institute, Shenzhen 518055, China

<sup>d</sup>State Key Laboratory of Pollution Control and Resource Reuse, School of Environment,  
Nanjing University, Nanjing, 210023, China

*\*Corresponding author.* Email address: [songchun@sicau.edu.cn](mailto:songchun@sicau.edu.cn) (C. Song);  
[liusijie@hust.edu.cn](mailto:liusijie@hust.edu.cn) (S. Liu); [lzhao@nju.edu.cn](mailto:lzhao@nju.edu.cn) (L. Zhao)

<sup>1</sup> C.S. and F.Y. contributed equally to this manuscript, considered as co-first authors.

Table S1 340 low molecular weight metabolites were identified and quantified in RH extracts

| Metabolites                      | Quant Masses | Metabolites                                | Quant Masses | Metabolites              | Quant Masses | Metabolites               | Quant Masses | Metabolites                     | Quant Masses |
|----------------------------------|--------------|--------------------------------------------|--------------|--------------------------|--------------|---------------------------|--------------|---------------------------------|--------------|
| (-)-Dihydrocarveol               | 169          | 4-Hydroxybenzoic acid                      | 267          | citric acid              | 147          | kytorphin                 | 263          | palatinitol                     | 259          |
| 1,2-Cyclohexanedione             | 227          | 4-hydroxybutyrate                          | 233          | citrulline               | 256          | lactic acid               | 117          | palmitic acid                   | 132          |
| 1,5-Anhydroglucitol              | 125          | 4-hydroxycinnamic acid                     | 249          | coniferyl alcohol        | 235          | Lactobionic Acid          | 259          | p-Anisic acid                   | 209          |
| 10-Hydroxydecanoic acid          | 227          | 4-Hydroxymandelic acid                     | 267          | Coprostan-3-one          | 267          | lactulose                 | 232          | p-benzoquinone                  | 121          |
| 11-beta-prostaglandin-F-2-alpha  | 199          | 4-Hydroxymandelonitrile                    | 223          | creatine degra           | 147          | L-Allothreonine           | 73           | Pelargonic acid                 | 187          |
| 1-Hydroxy-2-naphthoic acid       | 227          | 4-Hydroxymethyl-3-methoxyphenoxycetic acid | 249          | Cumic Acid               | 221          | L-dopa                    | 218          | Phenyl beta-D-glucopyranoside   | 225          |
| 1-Hydroxyanthraquinone           | 281          | 4-HYDROXYPYRIDINE                          | 152          | cuminic alcohol          | 207          | leucine                   | 158          | phenylacetaldehyde              | 137          |
| 1-Kestose                        | 217          | 4-methylumbelliferone                      | 267          | cycloleucine             | 156          | Leucrose                  | 204          | Phenylacetic acid               | 91           |
| 1-Methyladenosine                | 213          | 4-nitrocatechol                            | 194          | Cysteinylglycine         | 176          | Levoglucofan              | 217          | phenylalanine                   | 192          |
| 1-Methylhydantoin                | 258          | 4-nitrophenol                              | 196          | cytidine                 | 240          | L-glutamic acid           | 84           | Phenylphosphoric acid phosphate | 213          |
| 1-Monopalmitin                   | 239          | 4-oxo-1H-quinoline-2-carboxylic acid       | 225          | D-(glycerol 1-phosphate) | 299          | L-homoserine              | 263          | phosphomycin                    | 267          |
| 2,3-Dimethylsuccinic acid        | 147          | 4-Vinylphenol dimer                        | 192          | D-alanyl-D-alanine       | 83           | linoleic acid             | 67           | phosphomycin                    | 84           |
| 2,4-diaminobutyric acid          | 202          | 5,6-dihydrouracil                          | 171          | D-Altrose                | 205          | linolenic acid            | 240          | Phytanic acid                   | 159          |
| 2,6-Diaminopimelic acid          | 184          | 5-Aminoimidazole-4-carboxamide             | 173          | D-Arabitol               | 217          | L-Malic acid              | 174          | Phytol                          | 213          |
| 20alpha-Hydroxycholesterol       | 201          | 5-Aminovaleric acid                        | 174          | Dehydroascorbic Acid     | 173          | Lumazine                  | 249          | picolinic acid                  | 180          |
| 22-Ketocholesterol               | 173          | 5-aminovaleric acid lactam                 | 105          | D-erythronolactone       | 179          | lysine                    | 174          | pimelic acid                    | 199          |
| 24,25-dihydrolanosterol          | 174          | 5-Hydroxyindole-3-acetic acid              | 218          | D-erythro-sphingosine    | 191          | Lyxonic acid, 1,4-lactone | 231          | Pipecolinic acid                | 156          |
| 2-Amino-1-phenylethanol          | 174          | 5-hydroxytryptophan                        | 263          | D-galacturonic acid      | 334          | Lyxose                    | 103          | proline                         | 142          |
| 2-amino-2-methylpropane-1,3-diol | 146          | 5-Methoxyindole-3-acetic acid              | 349          | D-Glyceric acid          | 189          | Maleamate                 | 244          | prostaglandin A2                | 199          |

|                                                     |     |                                 |     |                               |     |                                       |     |                        |     |
|-----------------------------------------------------|-----|---------------------------------|-----|-------------------------------|-----|---------------------------------------|-----|------------------------|-----|
| 2-Amino-2-norbornanecarboxylic acid                 | 259 | 5-Methoxytryptamine             | 174 | dibenzofuran                  | 56  | maleic acid                           | 245 | Prostaglandin E2       | 225 |
| 2-aminoethanethiol                                  | 130 | 5-Methylresorcinol              | 267 | Digalacturonic acid           | 204 | Maleimide                             | 154 | putrescine             | 174 |
| 2'-deoxyadenosine                                   | 207 | 6-Aminopenicillanic acid        | 188 | Dihydroxyacetone              | 174 | malonic acid                          | 173 | pyrogallol             | 239 |
| 2'-Deoxycytidine 5'-triphosphate dehydrated product | 160 | 6-deoxy-D-glucose               | 117 | Dithioerythritol              | 263 | maltose                               | 204 | Pyruvic acid           | 174 |
| 2-Deoxy-D-galactose                                 | 142 | 6-hydroxy caproic acid          | 261 | DL-dihydroxyserine            | 132 | maltotriose                           | 204 | quinic acid            | 255 |
| 2-deoxy-D-glucose                                   | 172 | 6-hydroxy caproic acid dimer    | 187 | dl-p-Hydroxyphenyllactic acid | 314 | mannitol                              | 205 | resveratrol            | 225 |
| 2-Deoxyerythritol                                   | 117 | 6-hydroxy caproic acid trimer   | 228 | D-Talose                      | 160 | Melatonin                             | 232 | ribose                 | 103 |
| 2'-deoxyguanosine                                   | 281 | 6-phosphogluconic acid          | 299 | Elaidic acid                  | 226 | Melezitose                            | 267 | ribulose-5-phosphate   | 227 |
| 2-Deoxytetronic acid                                | 233 | 8-Aminocaprylic acid            | 213 | epsilon-Caprolactam           | 170 | Menthone                              | 82  | Saccharic acid         | 333 |
| 2-Deoxyuridine                                      | 169 | Abietic Acid                    | 185 | Ergosterol                    | 210 | methionine sulfoxide                  | 128 | scopoletin             | 183 |
| 2-Furoic Acid                                       | 125 | acetanilide                     | 199 | Erythrose                     | 205 | methyl dodecanoate                    | 185 | Sedoheptulose          | 204 |
| 2-hydroxy-3-isopropylbutanedioic acid               | 259 | Acetol                          | 219 | Ethanolamine                  | 174 | methyl octanoate                      | 87  | serine                 | 132 |
| 2-Hydroxybiphenyl                                   | 227 | Acetophenone                    | 138 | farnesol                      | 123 | Methyl Phosphate                      | 241 | Sinapyl alcohol        | 210 |
| 2-hydroxybutanoic acid                              | 131 | Acetylsalicylic Acid            | 121 | ferulic acid                  | 249 | methyl trans-cinnamate                | 131 | Sophorose              | 204 |
| 2-hydroxypyridine                                   | 152 | Aconitic Acid                   | 229 | formononetin                  | 174 | Methyl yellow                         | 121 | sorbitol               | 132 |
| 2-Hydroxyvaleric acid                               | 247 | adenine                         | 264 | fructose                      | 225 | Methyl-beta-D-galactopyranoside       | 204 | sorbose                | 84  |
| 2-ketoadipate                                       | 100 | adenosine                       | 230 | fucose                        | 160 | Methylmalonic acid                    | 86  | stearic acid           | 132 |
| 2-ketobutyric acid                                  | 84  | Adipamide                       | 255 | fumaric acid                  | 245 | Mono(2-ethylhexyl)phthalate           | 221 | succinate semialdehyde | 89  |
| 2-keto-isovaleric acid                              | 186 | adipic acid                     | 275 | Galactinol                    | 204 | Monoolein                             | 201 | succinic acid          | 247 |
| 2-Ketovaleric acid                                  | 89  | ADRENOSTERONE                   | 226 | Galactonic acid               | 217 | myo-inositol                          | 267 | sucrose                | 229 |
| 2-methylfumarate                                    | 259 | alanine                         | 116 | Gallic acid                   | 281 | Myristic Acid                         | 195 | sulfuric acid          | 259 |
| 2-Methylglutaric Acid                               | 123 | Alizarin                        | 180 | Gentiobiose                   | 204 | N-(2-hydroxyethyl)-iminodiacetic acid | 232 | Synephrine             | 267 |
| 3,4-Dihydroxyphenyl glycol                          | 267 | Allantoic acid                  | 259 | gentisic acid                 | 223 | N-Acetyl-beta-D-mannosamine           | 84  | Tagatose               | 263 |
| 3,4-Dihydroxypyridine                               | 240 | allose                          | 249 | Glucoheptonic acid            | 259 | N-Acetyl-D-galactosamine              | 202 | tartaric acid          | 219 |
| 3,5-Dihydroxyphenyl glycine                         | 223 | alpha-D-glucosamine 1-phosphate | 98  | gluconic acid                 | 205 | N-Acetylisatin                        | 233 | Tartronic acid         | 102 |
| 3,6-Anhydro-D-galactose                             | 231 | alpha-ketoisocaproic            | 183 | Gluconic lactone              | 160 | N-Acetyl-L-glutamic acid              | 288 | terephthalic acid      | 221 |

|                                    |     |                         |     |                        |     |                                         |     |                                  |     |
|------------------------------------|-----|-------------------------|-----|------------------------|-----|-----------------------------------------|-----|----------------------------------|-----|
| 3-Aminoisobutyric acid             | 102 | acid Aminoxyacetic acid | 235 | glucose                | 244 | N-Acetyl-L-leucine                      | 228 | Tetradecanoic acid, methyl ester | 199 |
| 3-hydroxy-3-methylglutaric acid    | 199 | Aniline-o-sulfonic acid | 182 | Glucose-1-phosphate    | 217 | N-Acetyl-N-formyl-5-methoxykynurenamine | 58  | Threitol                         | 267 |
| 3-Hydroxyanthranilic acid          | 222 | asparagine              | 159 | glucose-6-phosphate    | 314 | N-Acetyltryptophan                      | 202 | Threonic acid                    | 220 |
| 3-hydroxybenzyl alcohol            | 179 | aspartic acid           | 232 | glucuronic acid        | 160 | N-alpha-Acetyl-L-ornithine              | 257 | threonine                        | 219 |
| 3-hydroxybutyric acid              | 191 | Atrazine-2-hydroxy      | 242 | glutamic acid          | 246 | naringenin                              | 267 | thymidine                        | 259 |
| 3-hydroxy-L-proline                | 230 | azelaic acid            | 201 | glutamine              | 155 | N-Carbamylglutamate                     | 246 | thymine                          | 255 |
| 3-Hydroxynorvaline                 | 131 | benzoic acid            | 179 | Glutaric Acid          | 263 | N-formyl-L-methionine                   | 233 | toluenesulfonic acid             | 229 |
| 3-Hydroxypalmitic acid             | 233 | Benzoylformic acid      | 104 | glycerol               | 205 | Nicotianamine                           | 249 | trans-4-hydroxy-L-proline        | 263 |
| 3-hydroxyphenylacetic acid         | 245 | beta-Alanine            | 248 | glycine                | 174 | nicotinic acid                          | 180 | trehalose                        | 191 |
| 3-Hydroxypropionic acid            | 219 | beta-Mannosylglycerate  | 204 | glycocyanine           | 263 | Nicotinoylglycine                       | 106 | trehalose-6-phosphate            | 227 |
| 3-Hydroxypyridine                  | 152 | biotin                  | 242 | glycolic acid          | 147 | N-Methyl-DL-alanine                     | 130 | tryptophan                       | 202 |
| 3-Methylamino-1,2-propanediol      | 86  | butyraldehyde           | 145 | gly-pro                | 174 | N-Methyl-L-glutamic acid                | 70  | tyramine                         | 239 |
| 3-Phenyllactic acid                | 193 | caprylic acid           | 201 | guaiacol               | 181 | N-methyltryptophan                      | 144 | tyrosine                         | 226 |
| 4,2',4'-trihydroxychalcone         | 222 | carbamoyl-aspartic acid | 257 | Guanidinosuccinic acid | 235 | noradrenaline                           | 235 | uracil                           | 241 |
| 4',5-dihydroxy-7-methoxyisoflavone | 232 | Carbazole               | 255 | guanine                | 352 | Norleucine                              | 86  | uridine                          | 217 |
| 4-Acetylbutyric acid               | 114 | Carnitine               | 159 | guanosine              | 245 | O-acetylserine                          | 102 | valine                           | 144 |
| 4-aminobutyric acid                | 174 | cellobiose              | 249 | Hesperitin             | 209 | octanal                                 | 226 | vanillin                         | 223 |
| 4-Androsten-11beta-ol-3,17-dione   | 267 | Cetadiol                | 253 | indole-3-acetamide     | 202 | oleic acid                              | 117 | Vanillylmandelic acid            | 297 |
| 4-Androsten-19-ol-3,17-dione       | 263 | cholesterol             | 136 | Indolelactate          | 259 | ornithine                               | 244 | xanthine                         | 267 |
| 4-Androstene-3,17-dione            | 169 | cholic acid             | 67  | inosine                | 259 | O-Succinylhomoserine                    | 128 | xylitol                          | 117 |
| 4-Cholesten-3-one                  | 222 | cis-gondoic acid        | 267 | isocitric acid         | 245 | oxalic acid                             | 147 | xylose                           | 234 |
| 4-hydroxy-3-methoxybenzoic acid;   | 267 | Citraconic acid         | 259 | Isoleucine             | 158 | oxamic acid                             | 190 | palatinitol                      | 259 |
| 4-hydroxybenzaldehyde              | 223 | Citraconic acid deagl   | 89  | Isomaltose             | 160 | oxoproline                              | 156 | palmitic acid                    | 132 |
